# Supplementary material
Source: PubMed Central journal article supplement (PMC4715260)
Supplement: supp_erv372_jexbot148262_file001.pdf [file supp_erv372_jexbot148262_file001.pdf]

## Selective chemical labeling reveals the genome-wide distribution of 5-hydroxymethylcytosine in rice

Xi-liang Wang, Shu-hui Song, Yong-Sheng Wu, Yu-Li Li, Ting-ting Chen, Zhi-yuan Huang, Shuo Liu, Thomas L. Dunwell, Gerd P. Pfeifer, Jim M. Dunwell, Raheema Wamaedeesa, Ihsan Ullah, Yinsheng Wang, Song-nian Hu

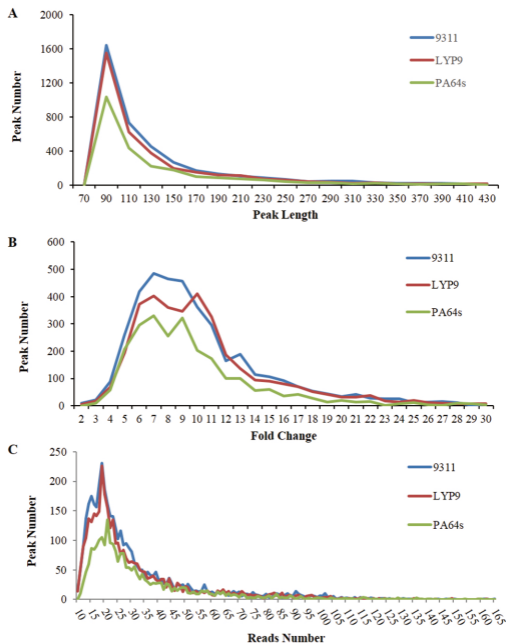

**Fig. S1.** Statistical properties of regions enriched for 5hmC modification. (A) Number of 5hmC peaks in various length; (B) Number of 5hmC peaks of a given fold-increase over background; (C) Number of reads distributed in 5hmC peaks.

P1:chr01\_39121226\_39121540

P2:chr04\_30960643\_30961018

P3:chr09\_4722881\_4723306

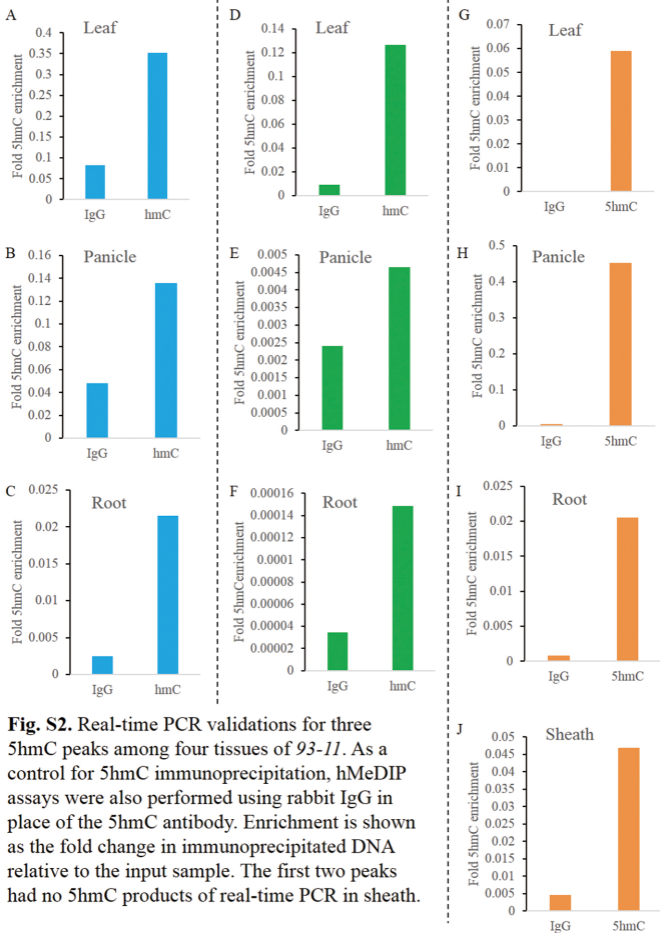

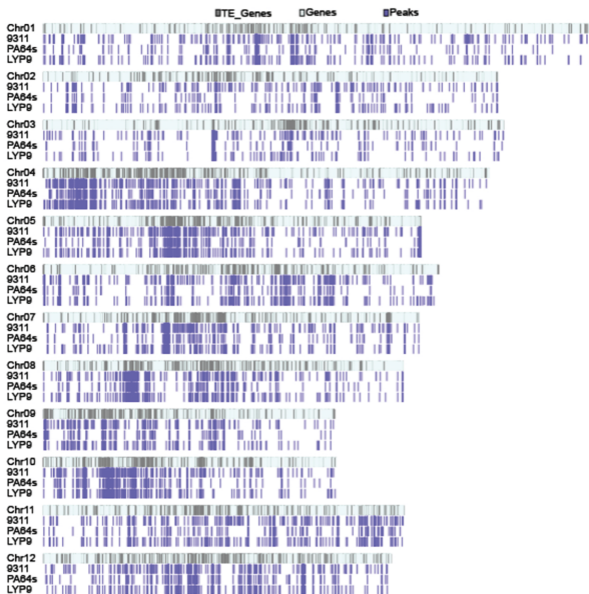

**Fig. S3.** Comparative whole genome distribution of 5hmC peaks among three cultivars.

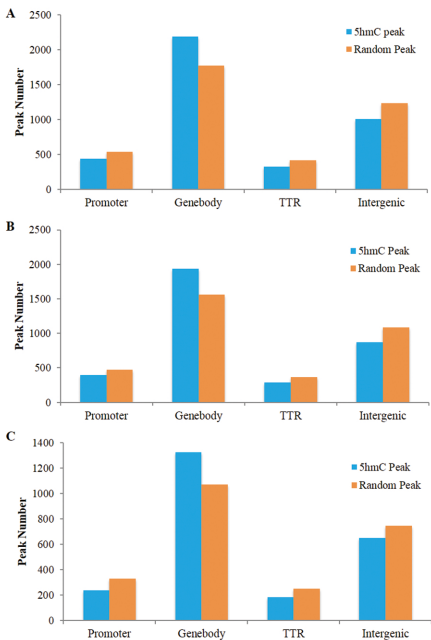

**Fig. S4.** Genome-wide distribution of those detected 5hmC peaks compared with 1000 times randomly simulated dataset in *93-11* (A), *LYP9* (B) and *PA64s* (C), respectively.

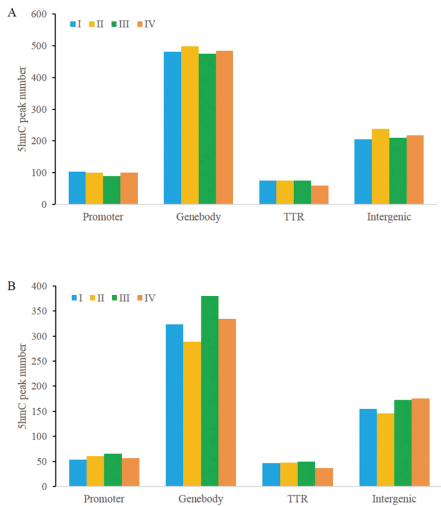

**Fig. S5.** Distribution of 5hmC peaks in each class for *LYP9* (A) and *PA64s* (B) in the whole genome.

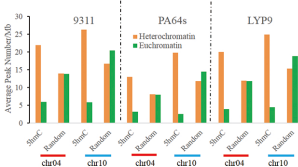

**Fig. S6.** Average number of 5hmC peaks per million bases in heterochromatin and euchromatin of chromosomes four and ten compared with random dataset.

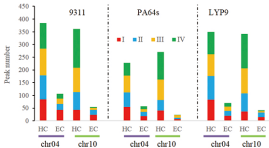

**Fig. S7.** Enrichment of 5hmC in heterochromatin (HC) over euchromatin (EC) of chromosomes four and ten in each class for three cultivars.

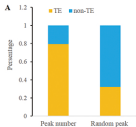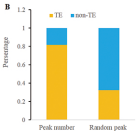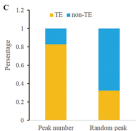

**Fig. S8.** Distribution of 5hmC peaks in TE genes and non-TE genes compared with a random dataset for *93-11* (A), *PA64s* (B) and *LYP9* (C), respectively.



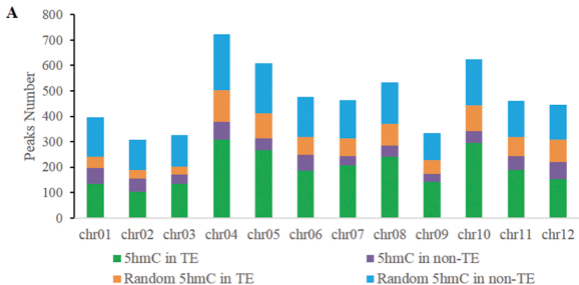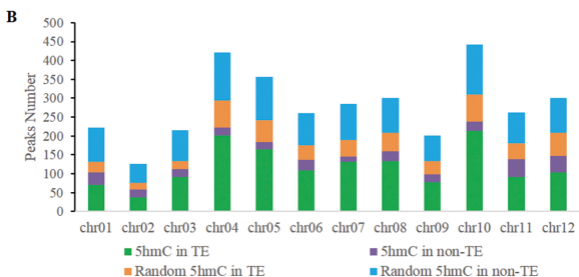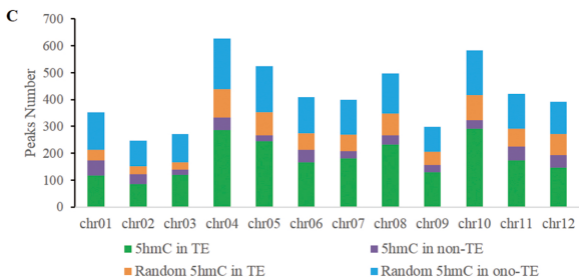

**Fig. S9.** Distribution of 5hmC peaks in TE genes and non-TE genes in every chromosome of *93-11* (A), *PA64s* (B) and *LYP9* (C) compared with a random dataset, respectively.

**A**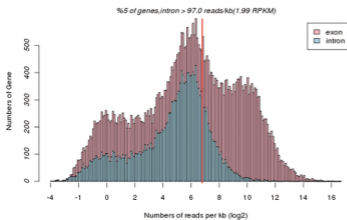**B**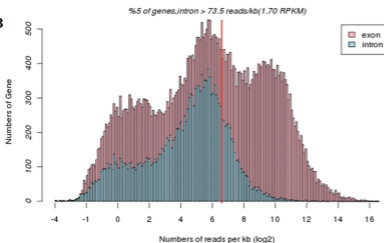**C**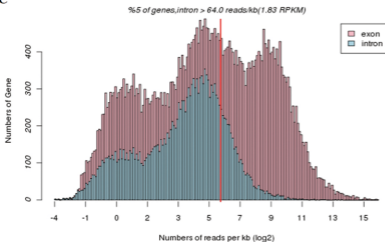

**Fig. S10.** Detection of gene expression in rice by mRNA-Seq. Distribution of mRNA-Seq reads in exons and introns. About 5% of genes contained > 97.0 reads, 73.5 reads and 64.0 reads per kilobase intron for *93-11* (A), *LYP9* (B) and *PA64s* (C), respectively. Accordingly, 97.0 reads, 73.5 reads and 64.0 reads per kilobase exon was arbitrarily used as a cutoff to detect gene expression for *93-11*, *LYP9* and *PA64s*, respectively.

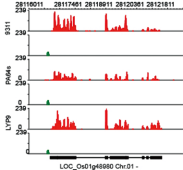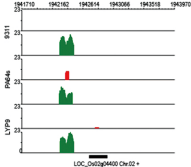

**Fig. S11.** Typical examples for expressed and silent genes with 5hmC peaks in read-level among three cultivars.

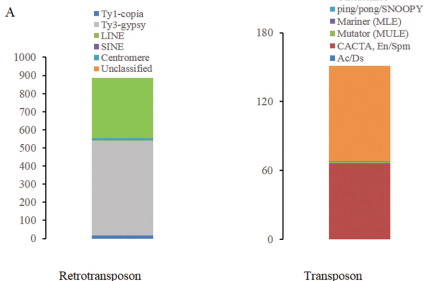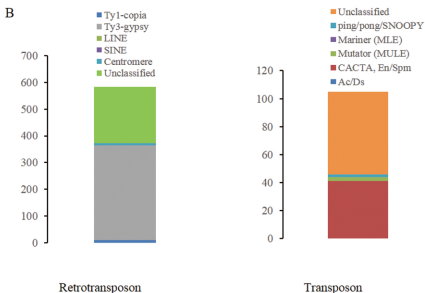

**Fig. S12.** Number of retrotransposons and transposons with MRPs for *LYP9* (A) and *PA64s* (B), respectively.
